# Supplementary material for: Fibroblast Growth Factor 21 Promotes C2C12 Cells Myogenic Differentiation by Enhancing Cell Cycle Exit
Source: Hindawi journal article supplement (doi:10.1155/2017/1648715), 2017-01-01
Supplement: f1 [file 1648715.f1.pdf]

Supplement Table. Quantitative PCR primer sequences

| Gene      | Forward                 | Reverse                 | Product size (bp) |
|-----------|-------------------------|-------------------------|-------------------|
| FGF21     | GTGTCAAAGCCTCTAGGTTTCTT | GGTACACATTGTAACCGTCCTC  | 123               |
| b-Klotho  | TCGGTACGTCTACTCACACCT   | AGCCAACAAGTCTTTTTCCAGA  | 88                |
| MyoD      | ATGATGACCCGTGTTTCGACT   | CACCGCAGTAGGGAAGTGT     | 119               |
| MyoG      | GCAGGCTCAAGAAAGTGAATGA  | TAGGCGCTCAATGTACTGGAT   | 122               |
| Myf5      | GCCTTCGGAGCACACAAAG     | TGACCTTCTTCAGGCGTCTAC   | 187               |
| Rb        | TTGGAGTCCGATTGTATTACCGT | AGCACAGGCCAGTAAAGACAT   | 128               |
| P16       | CGCAGGTTCTTGGTCACTGT    | TGTTACGAAAGCCAGAGCG     | 127               |
| P18       | GGGGACCTAGAGCAACTTACT   | AAATTGGGATTAGCACCTCTGAG | 149               |
| P19       | CTGGAAGAAGTCTGCGTCGG    | GTCTTGCCAAAGCGTTTCAG    | 125               |
| P21       | CGAGAACGGTGGAACTTTGAC   | CCAGGGCTCAGGTAGACCTT    | 107               |
| P27       | TCAAACGTGAGAGTGTCTAACG  | CCGGGCCGAAGAGATTTCTG    | 103               |
| P45       | CCTCCAAGGAAACGAGTCAAG   | CAGGAGACACCTGGAAAGTTC   | 98                |
| P57       | GCAGGACGAGAATCAAGAGCA   | GCTTGGCGAAGAAGTCGTT     | 119               |
| CyclinD1  | TGACTGCCGAGAAGTTGTGC    | CTCATCCGCCTCTGGCATT     | 164               |
| CyclinD2  | GAGTGGGAACTGGTAGTGTTG   | CGCACAGAGCGATGAAGGT     | 154               |
| CyclinD3  | TGGATCGCTACCTGTCCTG     | CCTGGTCCGTATAGATGCAAAG  | 138               |
| cyclin E1 | CCGTCTTGAATTGGGGCAATA   | GAGCTTATAGACTTCGCACACC  | 167               |
| CDK1      | AAATCCTCCAGGGAATTGTGTTT | CAGCCAGTTTGATTGTTCTTTG  | 105               |
| CDK2      | ATGGAGAACTTCCAAAAGGTGG  | CAGTCTCAGTGTTCGAGCCG    | 124               |
| CDK4      | AAGGTCACCCTAGTGTGTTGAGC | CCGCTTAGAACTGACGCATTAG  | 119               |
| CDK6      | TCTCACAGAGTAGTGCATCGT   | CGAGGTAAGGGCCATCTGAAAA  | 123               |
| E2F1      | TGCAGAAACGGCGCATCTAT    | CCGCTTACCAATCCCCACC     | 122               |
| CDC20     | TTCGTGTTTCGAGAGCGATTTG  | ACCTTGGAAGTAGATTTGCCAG  | 191               |
| GAPDH     | AGGTCGGTGTGAACGGATTTG   | TGTAGACCATGTAGTTGAGGTCA | 123               |
